# Supplementary material
Source: MDPI journal article supplement (https://www.mdpi.com/2073-4352/13/12/1669)
Supplement: s1 [file s1]

# New Polynuclear Coordination Compounds Based on 2-(Carboxyphenyl)iminodiacetate Anion: Synthesis and X-rays Crystal Structures

1) Infrared spectra of compounds **1-4** in KBr mulls.

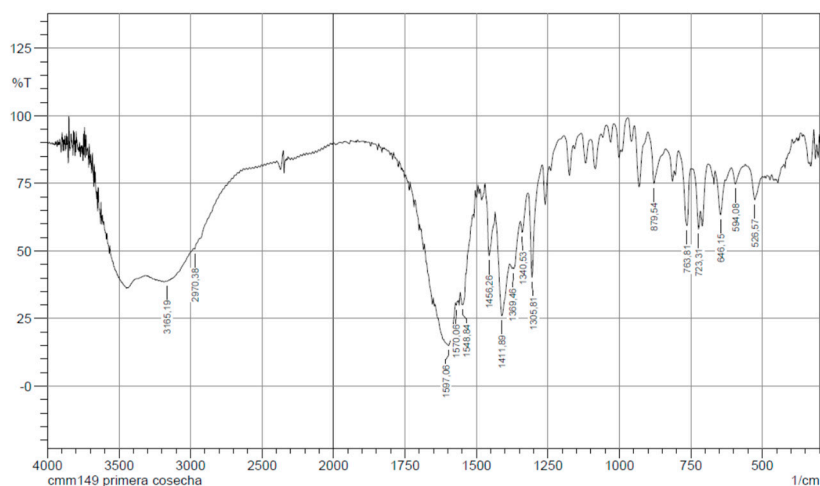

Figure S1. FT-IR spectrum of compound **1**.

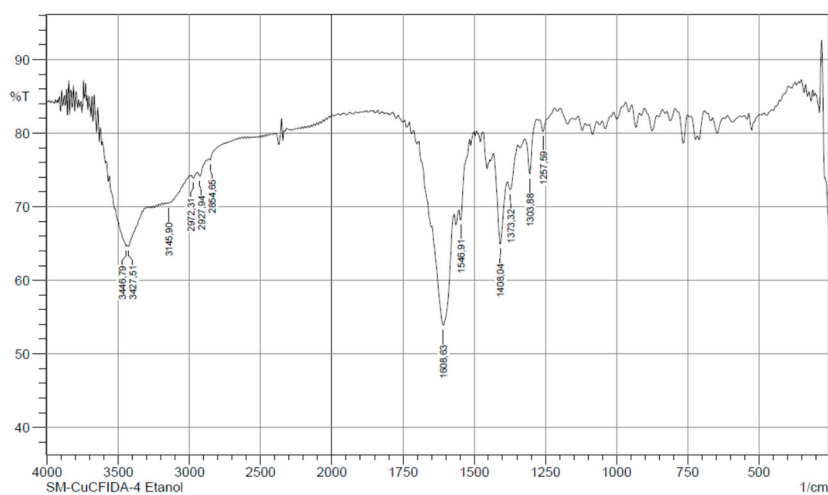

Figure S2. FT-IR spectrum of compound **2**.

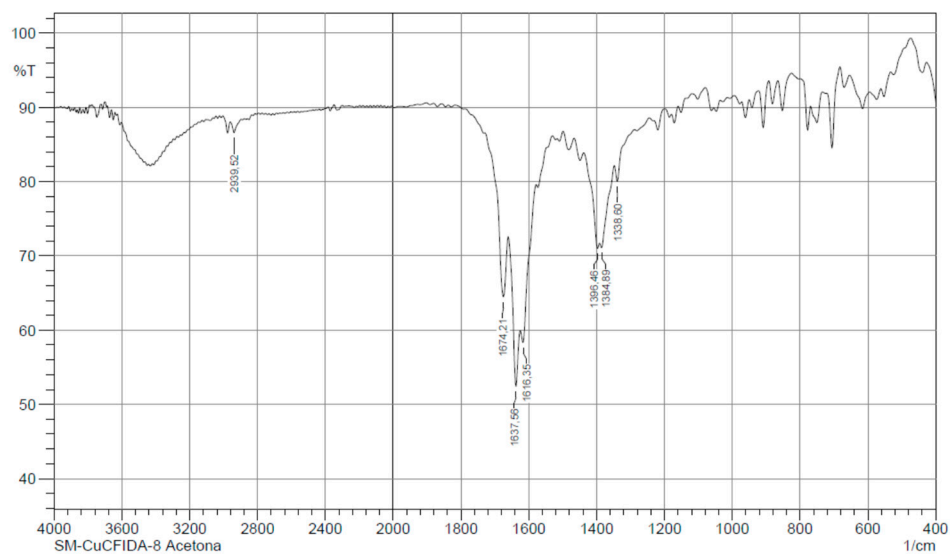

Figure S3. FT-IR of compound 3.

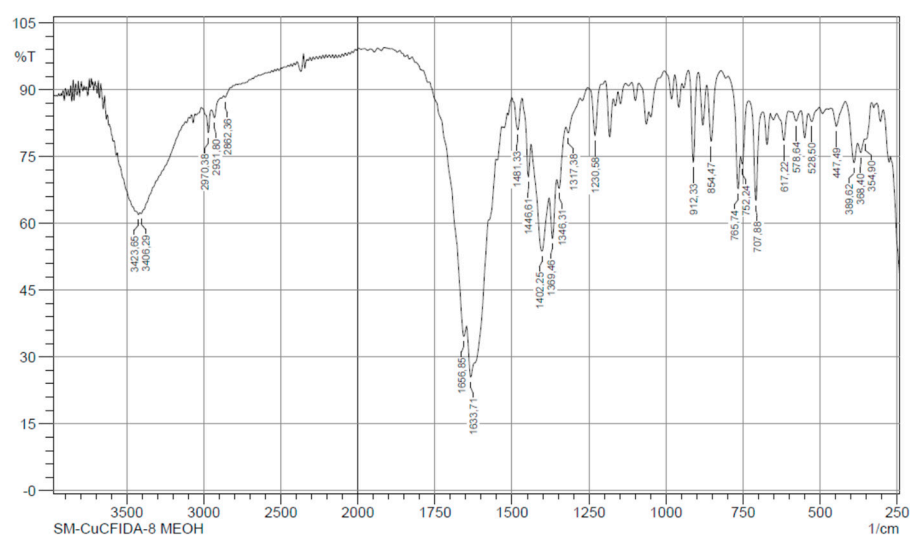

Figure S4. FT-IR of compound 4.

2) Thermogravimetric analysis of compounds **1** and **4**.

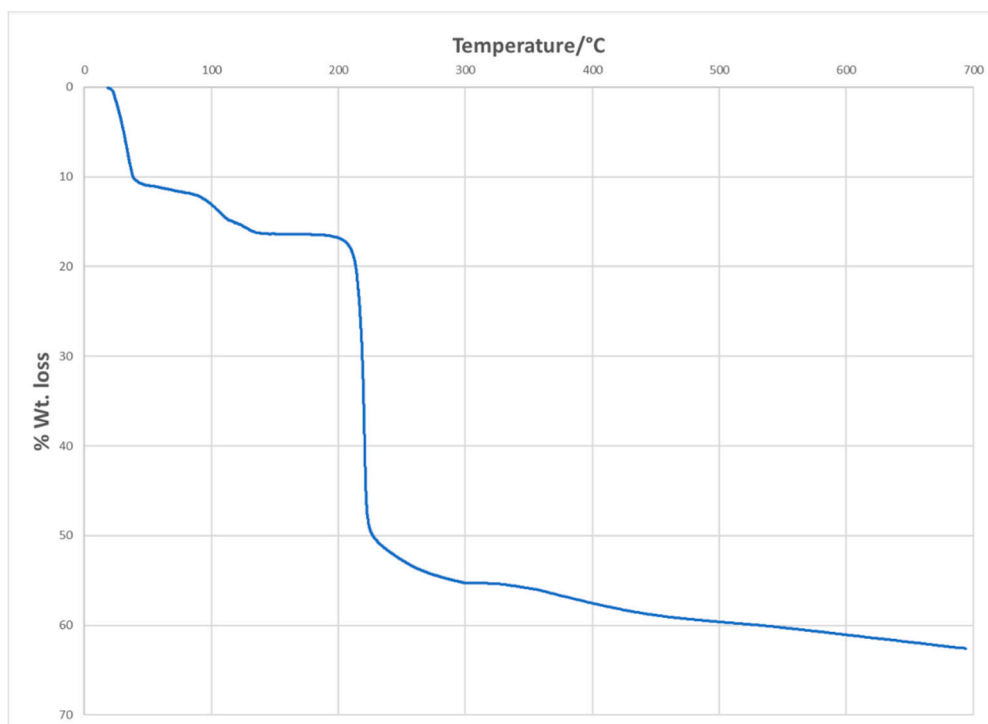

**Figure S5.** TGA of compound **1**.

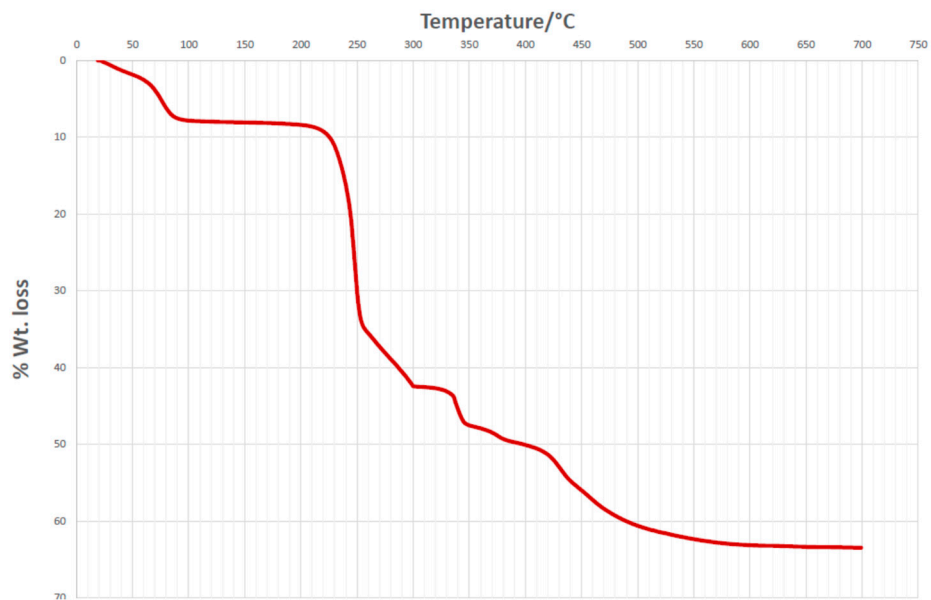

**Figure S6.** TGA of compound **4**.

### 3) Additional information for the crystal structures of compounds **1-4**

**Table S1.** Selected bond angles (°) for the coordination center in compounds **1** and **2**<sup>†</sup>.

| Compound                                      | 1          | Angles                                        |            | 2 |
|-----------------------------------------------|------------|-----------------------------------------------|------------|---|
| O(1)–Cu(1)–O(6) <sup>#1</sup>                 | 95.89(13)  | O(1)–Cu(1)–O(6) <sup>#3</sup>                 | 95.87(11)  |   |
| O(1)–Cu(1)–O(2) <sup>#1</sup>                 | 96.83(11)  | O(1)–Cu(1)–O(2) <sup>#3</sup>                 | 97.98(9)   |   |
| O(1)–Cu(1)–O(3) <sup>#1</sup>                 | 92.36(13)  | O(1)–Cu(1)–O(3) <sup>#3</sup>                 | 92.38(11)  |   |
| O(1)–Cu(1)–N(1) <sup>#1</sup>                 | 173.20(13) | O(1)–Cu(1)–N(1) <sup>#3</sup>                 | 173.74(11) |   |
| O(6) <sup>#1</sup> –Cu(1)–O(2) <sup>#1</sup>  | 92.80(12)  | O(6) <sup>#3</sup> –Cu(1)–O(2) <sup>#3</sup>  | 92.23(10)  |   |
| O(6) <sup>#1</sup> –Cu(1)–O(3) <sup>#1</sup>  | 156.58(13) | O(6) <sup>#3</sup> –Cu(1)–O(3) <sup>#3</sup>  | 156.91(11) |   |
| O(6) <sup>#1</sup> –Cu(1)–N(1) <sup>#1</sup>  | 89.18(13)  | O(6) <sup>#3</sup> –Cu(1)–N(1) <sup>#3</sup>  | 89.20(11)  |   |
| O(3) <sup>#1</sup> –Cu(1)–O(2) <sup>#1</sup>  | 107.96(13) | O(3) <sup>#3</sup> –Cu(1)–O(2) <sup>#3</sup>  | 107.95(11) |   |
| O(3) <sup>#1</sup> –Cu(1)–N(1) <sup>#1</sup>  | 84.67(13)  | O(3) <sup>#3</sup> –Cu(1)–N(1) <sup>#3</sup>  | 84.29(11)  |   |
| N(1) <sup>#1</sup> –Cu(1)–O(2) <sup>#1</sup>  | 78.35(11)  | N(1) <sup>#3</sup> –Cu(1)–O(2) <sup>#3</sup>  | 78.11(10)  |   |
| O(7)–Cu(2)–O(8) <sup>#2</sup>                 | 92.76(12)  | O(7)–Cu(2)–O(8) <sup>#4</sup>                 | 93.74(10)  |   |
| O(7)–Cu(2)–O(9) <sup>#2</sup>                 | 95.83(14)  | O(7)–Cu(2)–O(12) <sup>#4</sup>                | 96.88(12)  |   |
| O(7)–Cu(2)–O(12) <sup>#2</sup>                | 96.16(14)  | O(7)–Cu(2)–O(9) <sup>#4</sup>                 | 95.76(12)  |   |
| O(7)–Cu(2)–N(2) <sup>#2</sup>                 | 169.76(13) | O(7)–Cu(2)–N(2) <sup>#4</sup>                 | 170.51(12) |   |
| O(9) <sup>#2</sup> –Cu(2)–O(8) <sup>#2</sup>  | 114.86(13) | O(12) <sup>#4</sup> –Cu(2)–O(8) <sup>#4</sup> | 90.96(11)  |   |
| O(9) <sup>#2</sup> –Cu(2)–N(2) <sup>#2</sup>  | 83.74(13)  | O(12) <sup>#4</sup> –Cu(2)–O(9) <sup>#4</sup> | 148.97(12) |   |
| O(12) <sup>#2</sup> –Cu(2)–O(8) <sup>#2</sup> | 92.00(13)  | O(12) <sup>#4</sup> –Cu(2)–N(2) <sup>#4</sup> | 88.68(11)  |   |
| O(12) <sup>#2</sup> –Cu(2)–O(9) <sup>#2</sup> | 149.90(14) | O(9) <sup>#4</sup> –Cu(2)–O(8) <sup>#4</sup>  | 116.35(12) |   |
| O(12) <sup>#2</sup> –Cu(2)–N(2) <sup>#2</sup> | 89.11(13)  | O(9) <sup>#4</sup> –Cu(2)–N(2) <sup>#4</sup>  | 83.14(11)  |   |
| N(2) <sup>#2</sup> –Cu(2)–O(8) <sup>#2</sup>  | 78.24(12)  | N(2) <sup>#4</sup> –Cu(2)–O(8) <sup>#4</sup>  | 78.44(10)  |   |
| O(2W)–Cu(3)–O(5)                              | 86.95(13)  | O(2W)–Cu(3)–O(5)                              | 87.11(11)  |   |
| O(2W)–Cu(3)–O(1W)                             | 92.83(12)  | O(2W)–Cu(3)–O(4W)                             | 92.89(11)  |   |
| O(2W)–Cu(3)–O(4W)                             | 92.51(13)  | O(2W)–Cu(3)–O(3W)                             | 93.46(11)  |   |
| O(5)–Cu(3)–O(1W)                              | 97.07(12)  | O(5)–Cu(3)–O(4W)                              | 168.95(11) |   |
| O(5)–Cu(3)–O(4W)                              | 168.75(13) | O(5)–Cu(3)–O(3W)                              | 97.81(10)  |   |
| O(4W)–Cu(3)–O(1W)                             | 94.18(13)  | O(4W)–Cu(3)–O(3W)                             | 93.22(11)  |   |
| O(3W)–Cu(3)–O(2W)                             | 168.65(14) | O(1W)–Cu(3)–O(2W)                             | 168.28(12) |   |
| O(3W)–Cu(3)–O(5)                              | 90.35(16)  | O(1W)–Cu(3)–O(5)                              | 89.23(12)  |   |
| O(3W)–Cu(3)–O(1W)                             | 98.44(14)  | O(1W)–Cu(3)–O(4W)                             | 88.57(13)  |   |
| O(3W)–Cu(3)–O(4W)                             | 87.99(16)  | O(1W)–Cu(3)–O(3W)                             | 98.07(12)  |   |

<sup>†</sup>Symmetry codes: <sup>#1</sup> -x+1/2, y+1/2, -z+3/2; <sup>#2</sup> -x+1/2, y-1/2, -z+5/2; <sup>#3</sup> -x+3/2, y+1/2, -z+3/2; <sup>#4</sup> -x+1/2, y-1/2, -z+3/2;

**Table S2.** Selected bond angles (°) for the coordination center in compounds **3** and **4**<sup>†</sup>.

| Compound                                     | 3          |                                | 4          |
|----------------------------------------------|------------|--------------------------------|------------|
| <i>Angles</i>                                |            |                                |            |
| O(1)#5–Cu(1)–O(3)                            | 89.55(17)  | O(5)–Cu(1)–O(3)                | 176.52(13) |
| O(1)#5–Cu(1)–N(1)                            | 172.90(18) | O(5)–Cu(1)–O(1)                | 87.90(10)  |
| O(5)–Cu(1)–O(1) <sup>#5</sup>                | 91.24(17)  | O(5)–Cu(1)–O(1) <sup>#9</sup>  | 92.93(10)  |
| O(5)–Cu(1)–O(3)                              | 177.70(17) | O(5)–Cu(1)–N(1)                | 92.70(10)  |
| O(5)–Cu(1)–N(1)                              | 92.74(17)  | O(3)–Cu(1)–O(1) <sup>#9</sup>  | 88.28(10)  |
| O(3)–Cu(1)–N(1)                              | 86.70(17)  | O(3)–Cu(1)–O(1)                | 88.63(10)  |
| O(1)–Na(1)–O(3) <sup>#6</sup>                | 173.31(14) | O(3)–Cu(1)–N(1)                | 86.48(9)   |
| O(5)–Na(1)–O(1)                              | 73.95(14)  | O(1)#9–Cu(1)–O(1)              | 106.8(7)   |
| O(5)–Na(1)–O(3) <sup>#6</sup>                | 102.58(14) | O(1)#9–Cu(1)–N(1)              | 171.37(11) |
| O(5)–Na(1)–O(3) <sup>#7</sup>                | 138.01(17) | N(1)–Cu(1)–O(1)                | 79.93(10)  |
| O(5)–Na(1)–O(4) <sup>#6</sup>                | 130.71(17) | O(5)–Na(1)–O(3) <sup>#10</sup> | 103.80(9)  |
| O(5)–Na(1)–O(2) <sup>#5</sup>                | 82.79(14)  | O(5)–Na(1)–O(3) <sup>#11</sup> | 136.66(11) |
| O(3) <sup>#7</sup> –Na(1)–O(1)               | 64.19(13)  | O(5)–Na(1)–O(2) <sup>#9</sup>  | 81.98(8)   |
| O(3) <sup>#7</sup> –Na(1)–O(3) <sup>#6</sup> | 119.40(15) | O(5)–Na(1)–O(6) <sup>#12</sup> | 83.27(9)   |
| O(3) <sup>#7</sup> –Na(1)–O(2) <sup>#5</sup> | 78.57(14)  | O(5)–Na(1)–O(4) <sup>#10</sup> | 126.45(10) |
| O(6) <sup>#8</sup> –Na(1)–O(1)               | 83.24(15)  | O(5)–Na(1)–O(1)                | 72.82(9)   |

|                                              |            |                                                |            |
|----------------------------------------------|------------|------------------------------------------------|------------|
| O(6) <sup>#8</sup> –Na(1)–O(5)               | 78.93(15)  | O(3) <sup>#11</sup> –Na(1)–O(3) <sup>#10</sup> | 119.24(10) |
| O(6) <sup>#8</sup> –Na(1)–O(3) <sup>#6</sup> | 90.50(15)  | O(3) <sup>#11</sup> –Na(1)–O(2) <sup>#9</sup>  | 75.42(8)   |
| O(6) <sup>#8</sup> –Na(1)–O(3) <sup>#7</sup> | 98.70(16)  | O(3) <sup>#11</sup> –Na(1)–O(4) <sup>#10</sup> | 83.65(9)   |
| O(6) <sup>#8</sup> –Na(1)–O(4) <sup>#6</sup> | 129.36(17) | O(3) <sup>#11</sup> –Na(1)–O(1)                | 64.35(8)   |
| O(6) <sup>#8</sup> –Na(1)–O(2) <sup>#5</sup> | 148.87(16) | O(2) <sup>#9</sup> –Na(1)–O(3) <sup>#10</sup>  | 115.64(8)  |
| O(4) <sup>#6</sup> –Na(1)–O(1)               | 138.12(16) | O(6) <sup>#12</sup> –Na(1)–O(3) <sup>#11</sup> | 98.65(10)  |
| O(4) <sup>#6</sup> –Na(1)–O(3) <sup>#6</sup> | 48.40(13)  | O(6) <sup>#12</sup> –Na(1)–O(3) <sup>#10</sup> | 92.85(8)   |
| O(4) <sup>#6</sup> –Na(1)–O(3) <sup>#7</sup> | 83.15(15)  | O(6) <sup>#12</sup> –Na(1)–O(2) <sup>#9</sup>  | 150.31(9)  |
| O(4) <sup>#6</sup> –Na(1)–O(2) <sup>#5</sup> | 81.46(14)  | O(6) <sup>#12</sup> –Na(1)–O(4) <sup>#10</sup> | 132.20(10) |
| O(2) <sup>#5</sup> –Na(1)–O(1)               | 67.52(13)  | O(6) <sup>#12</sup> –Na(1)–O(1)                | 84.70(8)   |
| O(2) <sup>#5</sup> –Na(1)–O(3) <sup>#6</sup> | 118.12(14) | O(4) <sup>#10</sup> –Na(1)–O(3) <sup>#10</sup> | 48.06(8)   |
|                                              |            | O(4) <sup>#10</sup> –Na(1)–O(2) <sup>#9</sup>  | 76.75(9)   |
|                                              |            | O(4) <sup>#10</sup> –Na(1)–O(1)                | 135.63(10) |
|                                              |            | O(1)–Na(1)–O(3) <sup>#10</sup>                 | 176.01(9)  |
|                                              |            | O(1)–Na(1)–O(2) <sup>#9</sup>                  | 66.37(8)   |

<sup>†</sup>Symmetry codes: <sup>#5</sup> -x+1, y+1/2, -z+1/2; <sup>#6</sup> x+1/2, y, -z+1/2; <sup>#7</sup> -x+1, y-1/2, -z+1/2; <sup>#8</sup> -x+3/2, y-1/2, z; <sup>#9</sup> -x+1/2, -y+1/2, z-1/2; <sup>#10</sup> -x+1/2, y+1/2, z; <sup>#11</sup> -x+1/2, -y+1/2, z+1/2; <sup>#12</sup> x, -y+1, z+1/2

**Table S3.** Hydrogen bonds for **1** [Å and °]\*.

| D-H...A                            | <i>d</i> (D-H) | <i>d</i> (H...A) | <i>d</i> (D...A) | <(DHA) |
|------------------------------------|----------------|------------------|------------------|--------|
| O(2W)-H(2WA)...O(3) <sup>#1</sup>  | 0.85           | 1.84             | 2.674(4)         | 167.9  |
| O(2W)-H(2WB)...O(8) <sup>#5</sup>  | 0.85           | 1.90             | 2.687(5)         | 153.4  |
| O(3W)-H(3WA)...O(12) <sup>#6</sup> | 0.85           | 1.90             | 2.754(5)         | 177.2  |
| O(3W)-H(3WB)...O(7) <sup>#5</sup>  | 0.85           | 2.06             | 2.853(5)         | 153.4  |
| O(4W)-H(4WA)...O(11) <sup>#6</sup> | 0.86           | 1.87             | 2.707(5)         | 164.1  |
| O(4W)-H(4WB)...O(4) <sup>#1</sup>  | 0.86           | 1.95             | 2.764(5)         | 157.2  |
| O(1W)-H(1WA)...O(5W)               | 0.86           | 1.86             | 2.697(6)         | 163.0  |
| O(1W)-H(1WB)...O(6W)               | 0.86           | 1.98             | 2.800(8)         | 158.5  |

\*Symmetry transformations used to generate equivalent atoms: <sup>#1</sup> -x + 1/2, y + 1/2, -z + 3/2; <sup>#5</sup> -x + 1, -y + 2, -z + 2; <sup>#6</sup> x + 1/2, -y + 3/2, z - 1/2.

**Table S4.** Hydrogen bonds for **2** [Å and °]\*

| D-H...A                            | <i>d</i> (D-H) | <i>d</i> (H...A) | <i>d</i> (D...A) | <(DHA) |
|------------------------------------|----------------|------------------|------------------|--------|
| O(2W)-H(2WA)...O(10) <sup>#5</sup> | 0.87           | 1.83             | 2.669(4)         | 159.5  |
| O(2W)-H(2WB)...O(3) <sup>#1</sup>  | 0.87           | 1.81             | 2.669(3)         | 167.8  |
| O(4W)-H(4WA)...O(4) <sup>#1</sup>  | 0.87           | 1.92             | 2.750(4)         | 160.4  |
| O(4W)-H(4WB)...O(11) <sup>#6</sup> | 0.87           | 1.87             | 2.724(4)         | 166.0  |
| O(3W)-H(3WA)...O(12) <sup>#6</sup> | 0.85           | 1.95             | 2.766(4)         | 160.8  |
| O(3W)-H(3WB)...O(9) <sup>#5</sup>  | 0.85           | 2.03             | 2.856(4)         | 162.6  |

|                                   |      |      |          |       |
|-----------------------------------|------|------|----------|-------|
| O(1W)-H(1WA)...O(13)              | 0.85 | 1.88 | 2.711(6) | 164.2 |
| O(1W)-H(1WB)...O(5W)              | 0.85 | 1.86 | 2.700(5) | 169.2 |
| C(4)-H(4B)...O(13) <sup>#1</sup>  | 0.97 | 2.65 | 3.442(8) | 138.7 |
| O(13)-H(13)...O(11) <sup>#3</sup> | 0.82 | 2.28 | 3.019(7) | 149.4 |

---

\*Symmetry transformations used to generate equivalent atoms: <sup>#1</sup>  $-x + 3/2, y + 1/2, -z + 3/2$ ; <sup>#5</sup>  $-x + 1, -y + 1, -z + 1$ ; <sup>#6</sup>  $x + 1/2, -y + 1/2, z - 1/2$
